# Supplementary material
Source: PubMed Central journal article supplement (PMC6311520)
Supplement: supp_RA118.004375_138708_1_supp_211508_pft7rt.pdf [file supp_RA118.004375_138708_1_supp_211508_pft7rt.pdf]

## Supporting Information

TABLE S1: Primers used to generate the OSM chimeras and point mutants.

| Primer Name                                                     | Sequence (5' -> 3')                                                |
|-----------------------------------------------------------------|--------------------------------------------------------------------|
| <b>Cytokine cloning in pCAG-GS vector</b>                       |                                                                    |
| PacI hOSM fw                                                    | AAAGGGAAATTAATTAAGCTAGCGCATCGCCACCATGGGG<br>GTA CTGCTCACACAGAGGACG |
| PacI hLIF fw                                                    | AAAGGGAAATTAATTAAGCTAGCGCATCGCCACCATGAAG<br>GTCTTGCGGCAGGAGTTGTG   |
| AscI HisTag rev                                                 | TTCCCTTTGGCGCGCCGCGGCCGCTATCAGTGGTGGTGGT<br>GGTGGTGCTCGAG          |
| <b>Mouse OSM sequence optimization and mouse/human chimeras</b> |                                                                    |
| mOSM SeqOpt PacI<br>fw                                          | AAAGGGAAATTAATTAAGCTAGCGCATCGCCACCATGCAG<br>ACGAGATTGCTGCGCACCCCTG |
| mOSM SeqOpt AscI<br>rev                                         | TTCCCTTTGGCGCGCCGCGGCCGCTATCAATGATGATGGT<br>GGTGATGCTCCAGCCT       |
| mOSM WT 1                                                       | ATGCAGACGAGATTGCTGCGC                                              |
| mOSM WT 2                                                       | GTCAGGCTCAGCAGGGTGCAGCAATCTCGTCTG                                  |
| mOSM WT 3                                                       | ACCCTGCTGAGCCTGACCCTGTCAGTCTTATCCTTTCT                             |
| mOSM WT 4                                                       | CGATTGGCAAGGGCCATAGAAAGGATAAGCAGTGACAGG                            |
| mOSM WT 5                                                       | ATGGCCCTTGCCAATCGCGGGTGCAGCAACAGC                                  |
| mOSM WT 6                                                       | GCTCAACAGTTGGCTGCTGCTGTTGCTGCACCCG                                 |
| mOSM WT 7                                                       | AGCAGCCA ACTGTTGAGCCAGCTTCAAACCAGGCCA                              |
| mOSM WT 8                                                       | GGTGTGCGCGT CAGGTTGGCCTGGTTTTGAAGCTG                               |
| mOSM WT 9                                                       | ACCTGACCGGCAACACCGAGAGCCTTCTTGAGCCCT                               |
| mOSM WT 10                                                      | GGTTTTGCAGGCGGATGTAGGGCTCAAGAAGGCTCTC                              |
| mOSM WT 11                                                      | ACATCCGCCTGCAAAACCTCAACACCCCCGACCTT                                |
| mOSM WT 12                                                      | GTGCACGCAGCGCGAAGGTCGGGGGTGTTGA                                    |
| mOSM WT 13                                                      | CGCGCTGCGTGCACCCAGCACAGCGTGGCT                                     |
| mOSM WT 14                                                      | GGTGTCTCGCTAGGGAAAGCCACGCTGTGCTGG                                  |
| mOSM WT 15                                                      | TTCCCTAGCGAGGACACCCTGAGGCAGTTGAGCAAGC                              |
| mOSM WT 16                                                      | CGGTGGACAGGAAGTGTGGCTTGCTCAACTGCCTCAG                              |
| mOSM WT 17                                                      | CACACTTCCTGTCCACCGTCTACACCACCCTGGACC                               |
| mOSM WT 18                                                      | TCGAGCTGGTACAGCACTCGGTCCAGGGTGGTGTAGA                              |
| mOSM WT 19                                                      | GAGTGCTGTACCAGCTCGACGCGCTCCGGCAGAA                                 |
| mOSM WT 20                                                      | GCGGGGGTCTTCAGAACTTCTGCCGGAGCGCG                                   |
| mOSM WT 21                                                      | GTTTCTGAAGACCCCCGCATTCCCCAAGTTGGACAGC                              |
| mOSM WT 22                                                      | CAGGATGTTGTGCTGCGCTGTCCA ACTTGGGGAAAT                              |
| mOSM WT 23                                                      | GCCAGGCACAACATCCTGGGCATCAGGAACAACGTCT                              |
| mOSM WT 24                                                      | AGAAGCCTAGCCATGCAGAAGACGTTGTTCTGATGCC                              |
| mOSM WT 25                                                      | TCTGCATGGCTAGGCTTCTGAACCACAGCCTTGAGATCC                            |

|                                          |                                               |
|------------------------------------------|-----------------------------------------------|
| mOSM WT 26                               | GGTTTGCCTGGGTTTCGGGGATCTCAAGGCTGTGGTTC        |
| mOSM WT 27                               | CCGAACCCACGCAAACCGACAGTGGCGCGAGCA             |
| mOSM WT 28                               | CGGGCGTAGTGGTAGACCTGCTCGCGCCACTGTC            |
| mOSM WT 29                               | GGTCTACCACTACGCCCAGCTGTTTAATACCAAGATAGGC      |
| mOSM WT 30                               | CCACAGAAAGCCGCAAGAGCCTATCTTGGTATTAACACG<br>T  |
| mOSM WT 31                               | TCTTGCGGCTTTCTGTGGGGTTACCATCGGTTTCATGGG       |
| mOSM WT 32                               | ACACTCTCCCGACGCTGCCCATGAACCGATGGTAACC         |
| mOSM WT 33                               | CAGCGTCGGGAGAGTGTTTCAGGGAGTGGGACGATG          |
| mOSM WT 34                               | CCTGCTCCTCGTGGAGCCATCGTCCCACTCCCTGA           |
| mOSM WT 35                               | GCTCCACGAGGAGCAGGAGGCTGGAGCATCACCA            |
| mOSM WT 36                               | ATGATGATGGTGGTGTATGCTCCAGCCT                  |
| mOSM AB1&2 10                            | GTCCTTGGATGCGGATGTAGGGCTCAAGAAGGCTCTC         |
| mOSM AB1&2 11                            | ACATCCGCATCCAAGGACTCGATGTGCCCAAGCTT           |
| mOSM AB1 12                              | GTGCAATGTTTCGCGAAGCTTGGGCACATCGA              |
| mOSM AB1 13                              | CGCGAACATTGCACCCAGCACAGCGTGGCT                |
| mOSM AB2 12                              | CGGCAGTGTTCGCGAAGCTTGGGCACATCGA               |
| mOSM AB2 13                              | CGCGAACACTGCCGGGAACGGCCTGGAGCT                |
| mOSM AB2 14                              | GGTGTCTCTCGCTAGGGAAAGCTCCAGGCCGTTCC           |
| mOSM D1 28                               | CGCTTGCAGTGGTAGACCTGCTCGCGCCACTGTC            |
| mOSM D1 29                               | GGTCTACCACTGCAAGCGACGCTTTTCAAAGAAAGCTCGA<br>A |
| mOSM D1 30                               | CCACAGAAAGCCGCATCCTTCGAGCTTTCTTTGAAAAGCGT     |
| mOSM D1 31                               | GGATGCGGCTTTCTGTGGGGTTACCATCGGTTTCATGGG       |
| mOSM D2 fw                               | CAGCCGCCACCCCAACCCCTGCAAGCGACGCTTTTCAAAG      |
| mOSM D2 rev                              | AGGGGTGGGGGTGGGCGGCTGGCTCGCGCCACTGTCCGTT<br>T |
| <b>Mouse OSM point mutants - AB loop</b> |                                               |
| mOSM L35I 10                             | GGTTTTGGATGCGGATGTAGGGCTCAAGAAGGCTCTC         |
| mOSM L35I 11                             | ACATCCGCATCCAAAACCTCAACACCCCGACCTT            |
| mOSM N37G 10                             | GTCCTTGCAGGCGGATGTAGGGCTCAAGAAGGCTCTC         |
| mOSM N37G 11                             | ACATCCGCCTGCAAGGACTCAACACCCCGACCTT            |
| mOSM N39D 11                             | ACATCCGCCTGCAAAAACCTCGACACCCCGACCTT           |
| mOSM N39D 12                             | GTGCACGCAGCGCGAAGGTCGGGGGTGTCTGA              |
| mOSM T40V 11                             | ACATCCGCCTGCAAAAACCTCAACGTGCCCGACCTT          |
| mOSM T40V 12                             | GTGCACGCAGCGCGAAGGTCGGGCACGTTGA               |
| mOSM D42K 11                             | ACATCCGCCTGCAAAAACCTCAACACCCCCAAACTT          |
| mOSM D42K 12                             | GTGCACGCAGCGCGAAGTTTGGGGGTGTTGA               |
| mOSM 35+37 10                            | GTCCTTGGATGCGGATGTAGGGCTCAAGAAGGCTCTC         |
| mOSM 35+37 11                            | ACATCCGCATCCAAGGACTCAACACCCCGACCTT            |
| mOSM 35+39 11                            | ACATCCGCATCCAAAACCTCGACACCCCGACCTT            |
| mOSM 35+40 11                            | ACATCCGCATCCAAAACCTCAACGTGCCCGACCTT           |
| mOSM 35+42 11                            | ACATCCGCATCCAAAACCTCAACACCCCCAAACTT           |

|                                          |                                                                 |
|------------------------------------------|-----------------------------------------------------------------|
| mOSM 37+39 11                            | ACATCCGCCTGCAAGGACTCGACACCCCCGACCTT                             |
| mOSM 37+40 11                            | ACATCCGCCTGCAAGGACTCAACGTGCCCCGACCTT                            |
| mOSM 37+42 11                            | ACATCCGCCTGCAAGGACTCAACACCCCCAAACTT                             |
| mOSM 39+40 11                            | ACATCCGCCTGCAAAACCTCGACGTTCCCGACCTT                             |
| mOSM 39+40 12                            | GTGCACGCAGCGCGAAGGTCGGGAACGTGCGA                                |
| mOSM 39+42 11                            | ACATCCGCCTGCAAAACCTCGACACCCCCAAACTT                             |
| mOSM 39+42 12                            | GTGCACGCAGCGCGAAGTTTGGGGGTGTCGA                                 |
| mOSM 40+42 11                            | ACATCCGCCTGCAAAACCTCAACGTGCCCAAGCTT                             |
| mOSM 40+42 12                            | GTGCACGCAGCGCGAAGCTTGGGCACGTTGA                                 |
| mOSM 35+37+39 11                         | ACATCCGCATCCAAGGACTCGACACCCCCGACCTT                             |
| mOSM 35+37+40 11                         | ACATCCGCATCCAAGGACTCAACGTGCCCCGACCTT                            |
| mOSM 35+37+42 11                         | ACATCCGCATCCAAGGACTCAACACCCCCAAACTT                             |
| mOSM 35+39+40 11                         | ACATCCGCATCCAAAACCTCGACGTTCCCGACCTT                             |
| mOSM 35+39+42 11                         | ACATCCGCATCCAAAACCTCGACACCCCCAAACTT                             |
| mOSM 35+40+42 11                         | ACATCCGCATCCAAAACCTCAACGTGCCCAAGCTT                             |
| mOSM 37+39+40 11                         | ACATCCGCCTGCAAGGACTCGACGTTCCCGACCTT                             |
| mOSM 37+39+42 11                         | ACATCCGCCTGCAAGGACTCGACACCCCCAAACTT                             |
| mOSM 37+40+42 11                         | ACATCCGCCTGCAAGGACTCAACGTGCCCAAGCTT                             |
| mOSM 39+40+42 11                         | ACATCCGCCTGCAAAACCTCGATGTGCCCAAGCTT                             |
| mOSM 39+40+42 12                         | GTGCACGCAGCGCGAAGCTTGGGCACATCGA                                 |
| mOSM<br>35+37+39+40 11                   | ACATCCGCATCCAAGGACTCGACGTTCCCGACCTT                             |
| mOSM<br>35+37+39+42 11                   | ACATCCGCATCCAAGGACTCGACACCCCCAAACTT                             |
| mOSM<br>35+37+40+42 11                   | ACATCCGCATCCAAGGACTCAACGTGCCCAAGCTT                             |
| mOSM<br>35+39+40+42 11                   | ACATCCGCATCCAAAACCTCGATGTGCCCAAGCTT                             |
| mOSM<br>37+39+40+42                      | ACATCCGCCTGCAAGGACTCGATGTGCCCAAGCTT                             |
| mOSM<br>35+37+39+40+42                   | ACATCCGCATCCAAGGACTCGATGTGCCCAAGCTT                             |
| <b>Human OSM mutants - mouse AB loop</b> |                                                                 |
| hOSM mAB fw                              | GACTCCTGGACCCCTATATACGTCTGCAAAACCTCAACACC<br>CCCGACCTTCGCGCTGCG |
| hOSM mAB rev                             | AAGGCCCGGGGCGCTCCCTGCACGCAGCGCGAAGGTCGG<br>GGGTGTTGAGGTTTTCGAG  |
| hOSM G39N fw                             | ATATACGTATCCAAAACCTGGATGTTCC                                    |
| hOSM G39N rev                            | GGAACATCCAGGTTTTGGATACGTATAT                                    |
| hOSM V42T fw                             | TCCAAGGCCTGGATACTCCTAAACTGAGAG                                  |
| hOSM V42T rev                            | CTCTCAGTTTAGGAGTATCCAGGCCTTGA                                   |
| hOSM K44D fw                             | GCCTGGATGTTCTGATCTGAGAGAGCACT                                   |
| hOSM K44D rev                            | AGTGCTCTCTCAGATCAGGAACATCCAGGC                                  |

|                   |                                               |
|-------------------|-----------------------------------------------|
| hOSM 39+42 fw     | AACCTGGATACTCCTAAACTGAGAGAGCACTGCA            |
| hOSM 39+42 rev    | GTATCCAGGTTTTGGATACGTATATAGGGGTCCA            |
| hOSM 39+44 fw     | AACCTGGATGTTCTGATCTGAGAGAGCACTGCAGGGAGC<br>G  |
| hOSM 39+44 rev    | ATCAGGAACATCCAGGTTTTGGATACGTATATAGGGGTCCA     |
| hOSM 42+44 fw     | ACTCCTGATCTGAGAGAGCACTGCAGGGAGCG              |
| hOSM 42+44 rev    | ATCAGGAGTATCCAGGCCTTGGATACGTATAT              |
| hOSM 39+42+44 fw  | AACCTGGATACTCCTGATCTGAGAGAGCACTGCAGGGAGC<br>G |
| hOSM 39+42+44 rev | ATCAGGAGTATCCAGGTTTTGGATACGTATATAGGGGTCCA     |

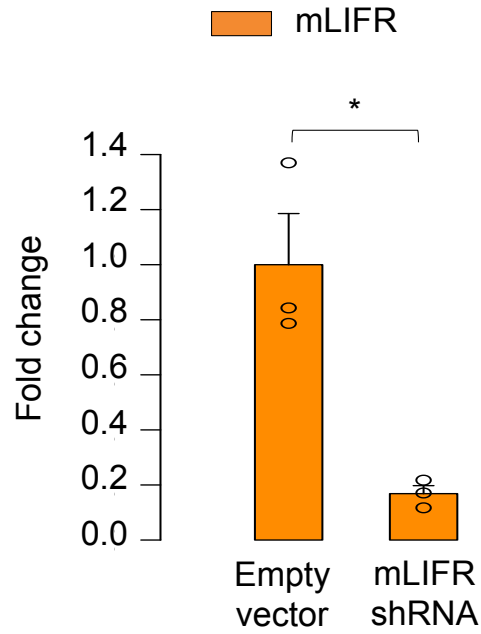

**FIGURE S1: mLIFR expression levels are reduced in the mLIFR shRNA-transduced NIH3T3 cells.** mLIFR expression levels were assessed by RT-qPCR employing validated primers and normalized to 18S expression levels. Values are presented as mean ± SEM, n=3 independent cultures; \*p<0.05.

**A**

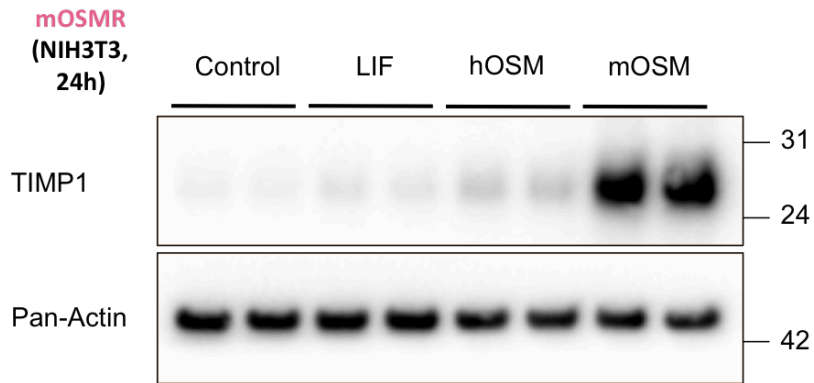

**B**

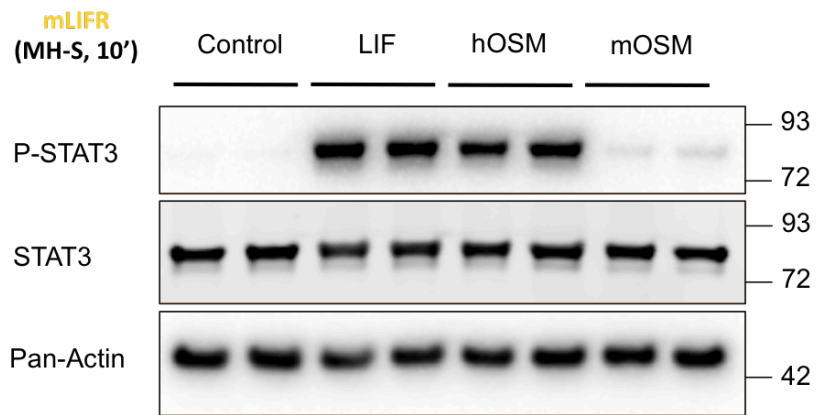

**FIGURE S2: Characteristics of the murine receptor activation readout system.** A) TIMP1 levels in NIH3T3 cells reflect OSMR activity 24 hours after stimulation. B) STAT3 phosphorylation levels in MH-S cells indicate LIFR activity 10 minutes after stimulation.
